# Supplementary material for: New flexible aerogels and xerogels derived from methyltrimethoxysilane/dimethyldimethoxysilane co-precursors
Source: Royal Society of Chemistry journal article supplement (doi:10.1039/c1jm13664j), 2011-01-01
Supplement: c1jm13664j.pdf [file c1jm13664j.pdf]

Supplementary Information for

## New flexible aerogels and xerogels derived from methyltrimethoxysilane/dimethyldimethoxysilane co-precursors

Gen Hayase, Kazuyoshi Kanamori\* and Kazuki Nakanishi

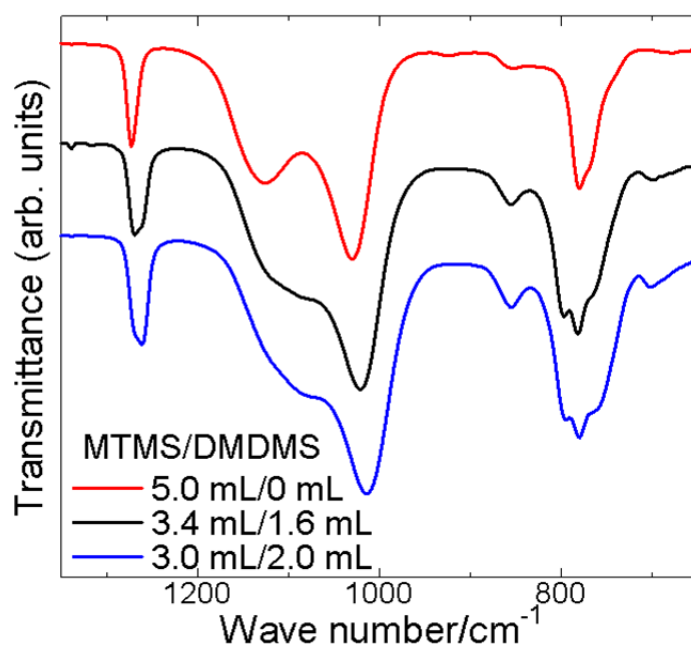

Fig. S1 FT-IR spectra of the aerogels prepared with different ratios of MTMS/DMDMS.

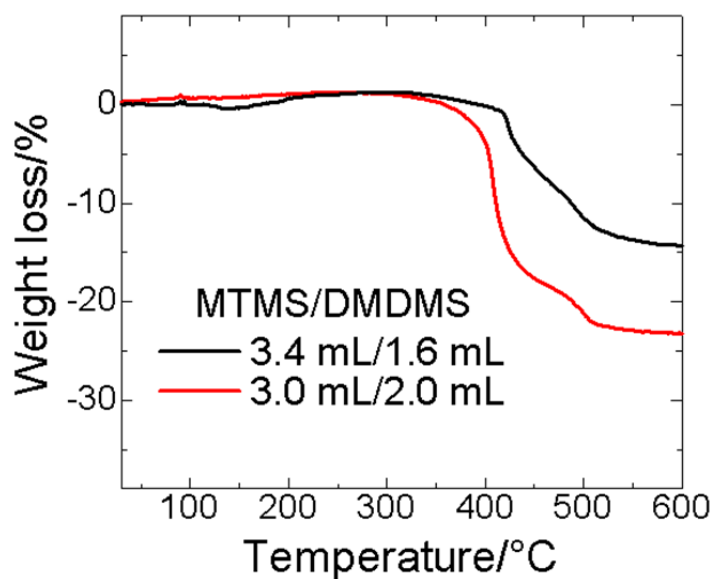

Fig. S2 TG curves of the aerogels prepared with varied ratios of MTMS/DMDMS.

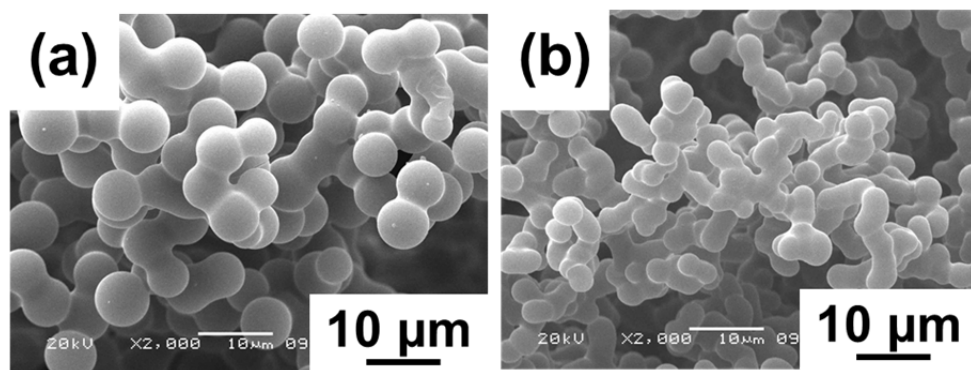

Fig. S3 SEM images of the aerogels prepared with different amounts of urea: (a) 1.0 g ( $U = 1.0$ ) and (b) 5.0 g ( $U = 5.0$ ).

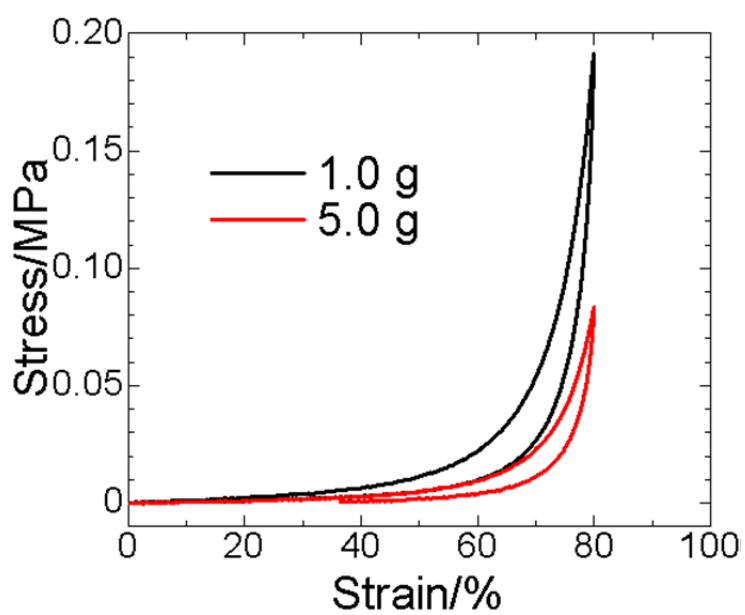

Fig. S4 Stress-strain curves of the aerogels prepared with varied amounts of urea.

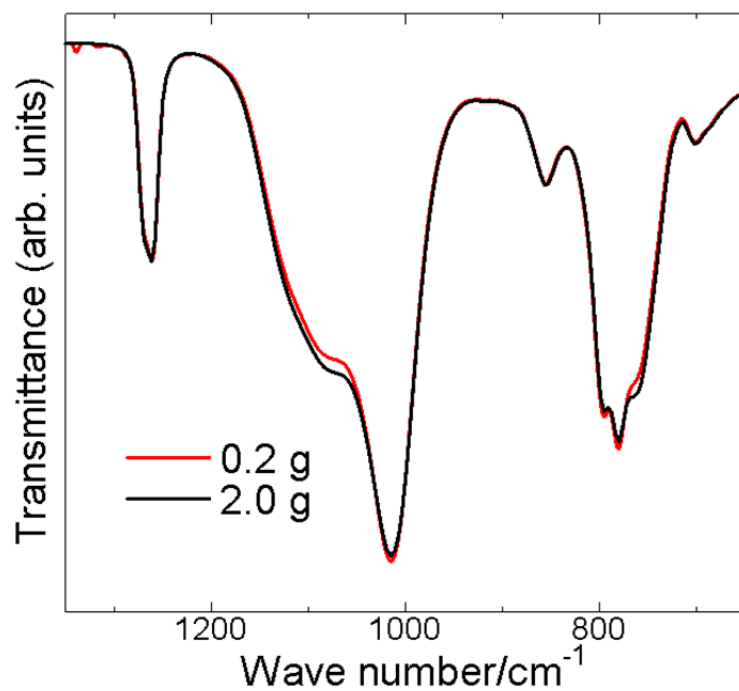

Fig. S5 FT-IR spectra of the aerogels prepared with varied amounts of CTAC.

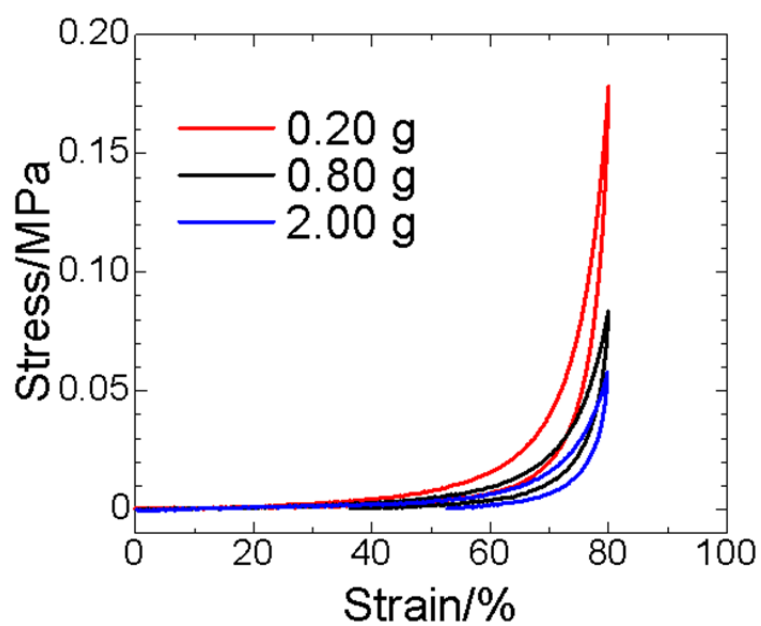

Fig. S6 Stress-strain curves of the aerogels prepared with varied amounts of CTAC.

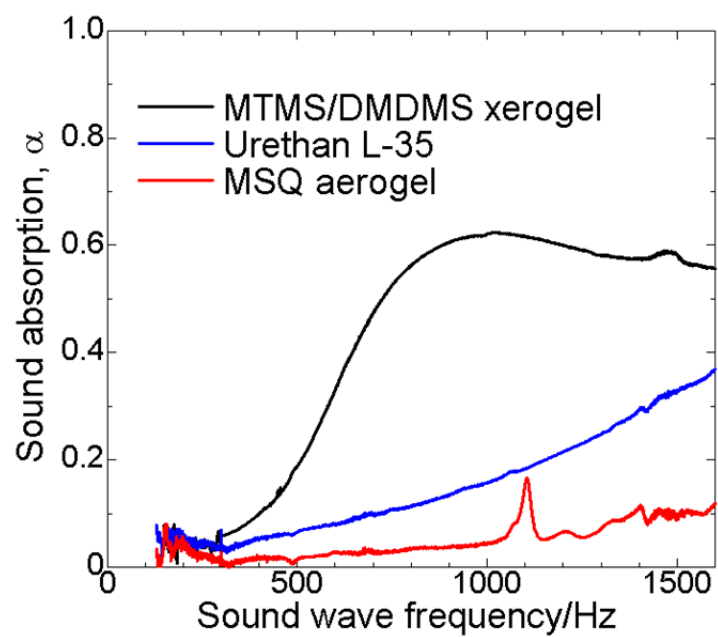

Fig. S7 Normal incidence sound absorption coefficients of the MTMS/DMDMS xerogel, the MSQ aerogel and the urethane form (a conventional acoustic absorbent). Absorbance in the MTMS/DMDMS xerogel is the highest among these three.
